# Supplementary material for: Schottky Junctions with Bi@Bi2MoO6 Core-Shell Photocatalysts toward High-Efficiency Solar N2-to-Ammonnia Conversion in Aqueous Phase
Source: MDPI journal article supplement (doi:10.3390/nano14090780), 2024-04-30
Supplement: s1 [file s1]

## Supplementary Material

### **Schottky junctions with Bi@Bi<sub>2</sub>MoO<sub>6</sub> core-shell photocatalysts toward high-efficiency solar N<sub>2</sub>-to-ammonia conversion in aqueous phase**

Meijiao Wang,<sup>a</sup> Guosong Wei,<sup>a</sup> Renjie Li,<sup>a</sup> Meng Yu,<sup>a</sup> Guangbo Liu,<sup>b,\*</sup> Yanhua Peng<sup>a,\*</sup>

*<sup>a</sup>College of Chemistry and Chemical Engineering, Qingdao University, Qingdao 266071, Shandong, P. R. China.*

*<sup>b</sup>Key Laboratory of Biofuels, Qingdao Institute of Bioenergy and Bioprocess Technology, Chinese Academy of Sciences, Qingdao 266101, Shandong, China*

\*Corresponding Authors

Email: [liugb@qibebt.ac.cn](mailto:liugb@qibebt.ac.cn), [yhpeng@qdu.edu.cn](mailto:yhpeng@qdu.edu.cn)

**Table S1.** Comparison of photocatalytic N<sub>2</sub> reduction activity on Bi-based photocatalysts.

| Catalyst                                                          | Light Source                                  | NH <sub>3</sub> /NH <sub>4</sub> <sup>+</sup> Yield<br>(μmol·g <sup>-1</sup> ·h <sup>-1</sup> ) | Ref.             |
|-------------------------------------------------------------------|-----------------------------------------------|-------------------------------------------------------------------------------------------------|------------------|
| Bi@Bi <sub>2</sub> MoO <sub>6</sub>                               | 300 W Xe lamp                                 | 86.0                                                                                            | <b>This work</b> |
| Bi <sub>2</sub> MoO <sub>6</sub> -Br-Ov                           | 300 W Xe lamp<br>(λ≥420 nm)                   | 32.0                                                                                            | [1]              |
| BiOBr-Fe-OVs                                                      | 300 W Xe lamp<br>(λ > 400 nm)                 | 46.1                                                                                            | [2]              |
| In-Bi <sub>2</sub> MoO <sub>6</sub>                               | 300 W Xe lamp (30.72<br>mW·cm <sup>-2</sup> ) | 53.4                                                                                            | [3]              |
| g-C <sub>3</sub> N <sub>4</sub> /Bi <sub>2</sub> MoO <sub>6</sub> | 500 W Xe lamp<br>(λ > 420)                    | 43.6                                                                                            | [4]              |
| Bi/BiOBr                                                          | 300 W Xe lamp                                 | 78.6                                                                                            | [5]              |
| W-Bi <sub>2</sub> MoO <sub>6</sub>                                | Two 45 W white LED<br>bulbs                   | 2240                                                                                            | [6]              |
| S-Bi <sub>2</sub> MoO <sub>6</sub>                                | 300 W Xe lamp<br>(λ≥420 nm)                   | 122.1                                                                                           | [7]              |
| Fe/Bi <sub>2</sub> O <sub>2.33</sub>                              | 300 W Xe lamp                                 | 118.7                                                                                           | [8]              |
| BiOBr/Bi <sub>4</sub> O <sub>5</sub> Br <sub>2</sub>              | 300 W Xe lamp<br>(λ≥420 nm)                   | 66.9                                                                                            | [9]              |
| In <sub>2</sub> O <sub>3</sub> /Bi <sub>2</sub> MoO <sub>6</sub>  | 300 W Xe lamp (30.72<br>mW·cm <sup>-2</sup> ) | 150.9                                                                                           | [10]             |
| Bi <sub>2</sub> MoO <sub>6</sub> /Bi-MOF                          | 300 W Xe lamp<br>(λ≥420 nm)                   | 125.8                                                                                           | [11]             |
| BiVO <sub>4</sub> / Sv-ZnIn <sub>2</sub> S <sub>4</sub>           | 300 W Xe lamp<br>(λ > 400 nm)                 | 80.6                                                                                            | [12]             |
| Bi <sub>12</sub> O <sub>17</sub> Cl <sub>2</sub> -OVs             | 500 W Xe lamp                                 | 23.43                                                                                           | [13]             |

|                                          |                                       |       |      |
|------------------------------------------|---------------------------------------|-------|------|
| CeO <sub>2</sub> -AD/Au                  | 300 W Xe lamp                         | 215.1 | [14] |
| AgPt-TiO <sub>2</sub>                    | 300 W Xe lamp                         | 38.4  | [15] |
| Ag/AgBr-δ-Bi <sub>2</sub> O <sub>3</sub> | 400 W Xe lamp                         | 364.2 | [16] |
| Au/TiO <sub>2</sub> -Vo                  | 300 W Xe lamp<br>(λ≥420 nm)           | 78.6  | [17] |
| Au/end-CeO <sub>2</sub>                  | Semiconductor diode<br>laser (808 nm) | 114.3 | [18] |

## Reference

- [1] Wang, G.; Huo, T.; Deng, Q.; Yu, F.; Xia, Y.; Li, H.; Hou, W. Surface-layer bromine doping enhanced generation of surface oxygen vacancies in bismuth molybdate for efficient photocatalytic nitrogen fixation. *Applied Catalysis B: Environmental* **2022**, *310*, 121319, doi:10.1016/j.apcatb.2022.121319.
- [2] Chen, X.; Zhang, X.; Li, Y.-H.; Qi, M.-Y.; Li, J.-Y.; Tang, Z.-R.; Zhou, Z.; Xu, Y.-J. Transition metal doping BiOBr nanosheets with oxygen vacancy and exposed {102} facets for visible light nitrogen fixation. *Applied Catalysis B: Environmental* **2021**, *281*, 119516, doi:10.1016/j.apcatb.2020.119516.
- [3] Ma, T.; Yang, C.; Guo, L.; Soomro, R.A.; Wang, D.; Xu, B.; Fu, F. Refining electronic properties of Bi<sub>2</sub>MoO<sub>6</sub> by In-doping for boosting overall nitrogen fixation via relay catalysis. *Applied Catalysis B: Environmental* **2023**, *330*, 122643, doi:10.1016/j.apcatb.2023.122643.
- [4] Vesali-Kermani, E.; Habibi-Yangjeh, A.; Diarmand-Khalilabad, H.; Ghosh, S. Nitrogen photofixation ability of g-C<sub>3</sub>N<sub>4</sub> nanosheets/Bi<sub>2</sub>MoO<sub>6</sub> heterojunction photocatalyst under visible-light illumination. *Journal of Colloid and Interface Science* **2020**, *563*, 81-91, doi:10.1016/j.jcis.2019.12.057.
- [5] Huang, Y.; Zhu, Y.; Chen, S.; Xie, X.; Wu, Z.; Zhang, N. Schottky Junctions with Bi Cocatalyst for Taming Aqueous Phase N<sub>2</sub> Reduction toward Enhanced Solar Ammonia Production. *Advanced Science* **2021**, *8*, doi:10.1002/advs.202003626.
- [6] Sharma, M.; Kumar, A.; Gill, D.; Jaiswal, S.; Patra, A.; Bhattacharya, S.; Krishnan, V. Boosting Photocatalytic Nitrogen Fixation via Nanoarchitectonics Using Oxygen Vacancy Regulation in W-Doped Bi<sub>2</sub>MoO<sub>6</sub> Nanosheets. *ACS Applied Materials & Interfaces* **2023**, *15*, 55765-55778, doi:10.1021/acsami.3c12563.
- [7] Liu, Z.; Luo, M.; Cao, Y.; Meng, L.; Yang, Y.; Li, X. Tuning the electronic properties of Bi<sub>2</sub>MoO<sub>6</sub> by S-doping to boost efficient photocatalytic nitrogen fixation reactions. *Journal of Catalysis* **2024**, *430*, doi:10.1016/j.jcat.2024.115347.
- [8] Zhu, C.; Zhang, L.; Cui, L.; Zhang, Z.; Li, R.; Wang, Y.; Wang, Y.; Fan, C.; Yu, Z.; Liu, J. Fe-Bi dual sites regulation of Bi<sub>2</sub>O<sub>2.33</sub> nanosheets to promote photocatalytic nitrogen fixation activity. *Journal of Colloid and Interface Science* **2024**, *661*, 46-58, doi:10.1016/j.jcis.2024.01.082.
- [9] Wang, H.; Chen, Z.; Shang, Y.; Lv, C.; Zhang, X.; Li, F.; Huang, Q.; Liu, X.; Liu, W.; Zhao, L.; et al. Boosting Carrier Separation on a BiOBr/Bi<sub>4</sub>O<sub>5</sub>Br<sub>2</sub> Direct Z-Scheme Heterojunction for Superior Photocatalytic Nitrogen Fixation. *Acs Catalysis* **2024**, doi:10.1021/acscatal.3c06169.
- [10] Huang, X.; Du, R.; Zhang, Y.; Ren, J.; Yang, Q.; Wang, K.; Ni, Y.; Yao, Y.; Ali Soomro, R.; Guo, L.; et al. Modulating charge oriented accumulation via interfacial chemical-bond on In<sub>2</sub>O<sub>3</sub>/Bi<sub>2</sub>MoO<sub>6</sub>

heterostructures for photocatalytic nitrogen fixation. *Journal of colloid and interface science* **2024**, 664, 33-44, doi:10.1016/j.jcis.2024.03.018.

[11] Dong, Q.; Li, X.; Sun, J.; Zhu, Y.; Liang, X.; Ren, H.; Labidi, A.; Wang, D.; Li, F.; Wang, C. Regulating concentration of surface oxygen vacancies in Bi<sub>2</sub>MoO<sub>6</sub>/Bi-MOF for boosting photocatalytic ammonia synthesis. *Journal of Catalysis* **2024**, 433, doi:10.1016/j.jcat.2024.115489.

[12] Zhang, G.; Yuan, X.; Xie, B.; Meng, Y.; Ni, Z.; Xia, S. S vacancies act as a bridge to promote electron injection from Z-scheme heterojunction to nitrogen molecule for photocatalytic ammonia synthesis. *Chemical Engineering Journal* **2022**, 433, doi:10.1016/j.cej.2021.133670.

[13] Kok, S.H.W.; Lee, J.; Chong, W.K.; Ng, B.-J.; Kong, X.Y.; Ong, W.J.; Chai, S.-P.; Tan, L.-L. Bismuth-rich Bi<sub>12</sub>O<sub>17</sub>Cl<sub>2</sub> nanorods engineered with oxygen vacancy defects for enhanced photocatalytic nitrogen fixation. *Journal of Alloys and Compounds* **2023**, 952, doi:10.1016/j.jallcom.2023.170015.

[14] Li, H.; Zhang, J.; Deng, X.; Wang, Y.; Meng, G.; Liu, R.; Huang, J.; Tu, M.; Xu, C.; Peng, Y.; et al. Structure and Defect Engineering Synergistically Boost High Solar-to-Chemical Conversion Efficiency of Cerium oxide/Au Hollow Nanomushrooms for Nitrogen Photofixation. *Angewandte Chemie-International Edition* **2024**, 63, doi:10.1002/anie.202316384.

[15] Bian, X.; Zhao, Y.; Zhang, S.; Li, D.; Shi, R.; Zhou, C.; Wu, L.-Z.; Zhang, T. Enhancing the Supply of Activated Hydrogen to Promote Photocatalytic Nitrogen Fixation. *Acs Materials Letters* **2021**, 3, 1521-1527, doi:10.1021/acsmaterialslett.1c00504.

[16] Gao, X.; Shang, Y.; Liu, L.; Gao, K. Ag plasmon resonance promoted 2D AgBr-δ-Bi<sub>2</sub>O<sub>3</sub> nanosheets with enhanced photocatalytic ability. *Journal of Alloys and Compounds* **2019**, 803, 565-575, doi:10.1016/j.jallcom.2019.06.311.

[17] Yang, J.; Guo, Y.; Jiang, R.; Qin, F.; Zhang, H.; Lu, W.; Wang, J.; Yu, J.C. High-Efficiency "Working-in-Tandem" Nitrogen Photofixation Achieved by Assembling Plasmonic Gold Nanocrystals on Ultrathin Titania Nanosheets. *Journal of the American Chemical Society* **2018**, 140, 8497-8508, doi:10.1021/jacs.8b03537.

[18] Jia, H.; Du, A.; Zhang, H.; Yang, J.; Jiang, R.; Wang, J.; Zhang, C.-y. Site-Selective Growth of Crystalline Ceria with Oxygen Vacancies on Gold Nanocrystals for Near-Infrared Nitrogen Photofixation. *Journal of the American Chemical Society* **2019**, 141, 5083-5086, doi:10.1021/jacs.8b13062.
